# Supplementary material
Source: publisher figshare collection journal article supplement (https://acs.figshare.com/ndownloader/files/4177831)
Supplement: Supplementary file 1 [file 4177831]

## Supplementary Information

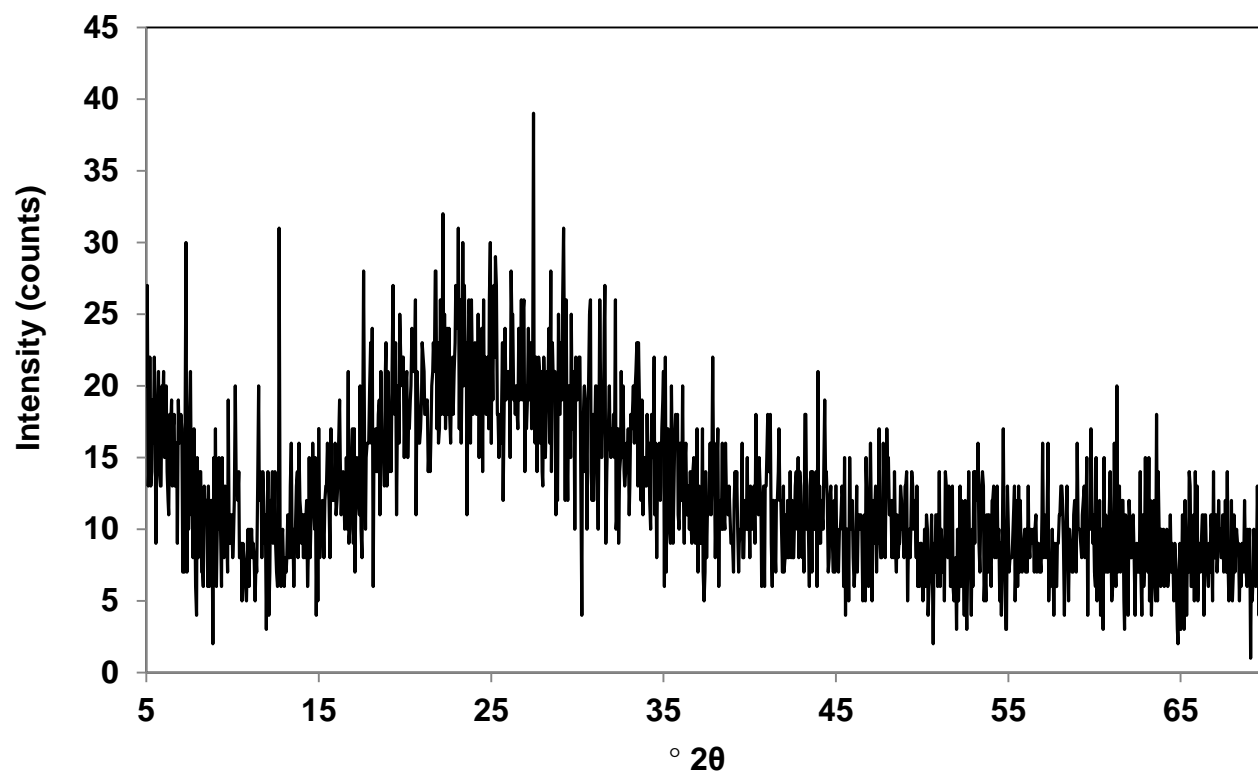

Figure S1. Powder X-ray diffraction pattern of the  $\text{Al}_{30}$  compound after thermogravimetric analysis indicates that the final product is an amorphous aluminum (oxy)hydroxide material. This powder pattern is representative of the final product after TGA for materials containing polyaluminum cations.
